# Supplementary material
Source: Springer Nature journal article supplement (https://www.springermedizin.de/resource/supplementary/12985_2014_2489_MOESM2_ESM.pdf/9606850)

# CIC Level (Absorbance)

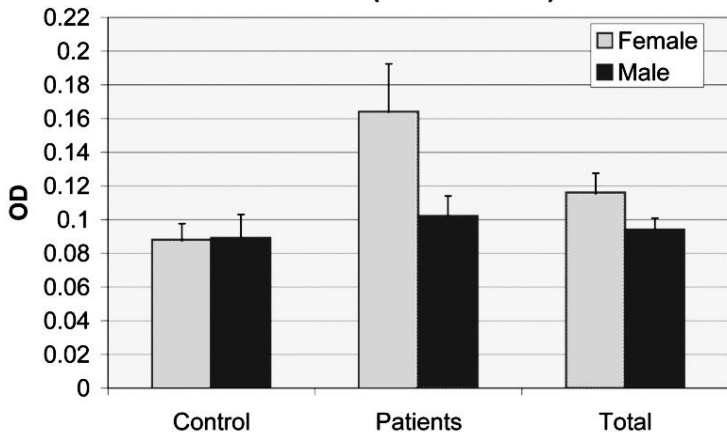

Supplement: MOESM2 [file 9606850]
